# Supplementary material
Source: Springer Nature journal article supplement (https://www.springermedizin.de/resource/supplementary/12889_2011_3429_MOESM4_ESM.pdf/9489050)

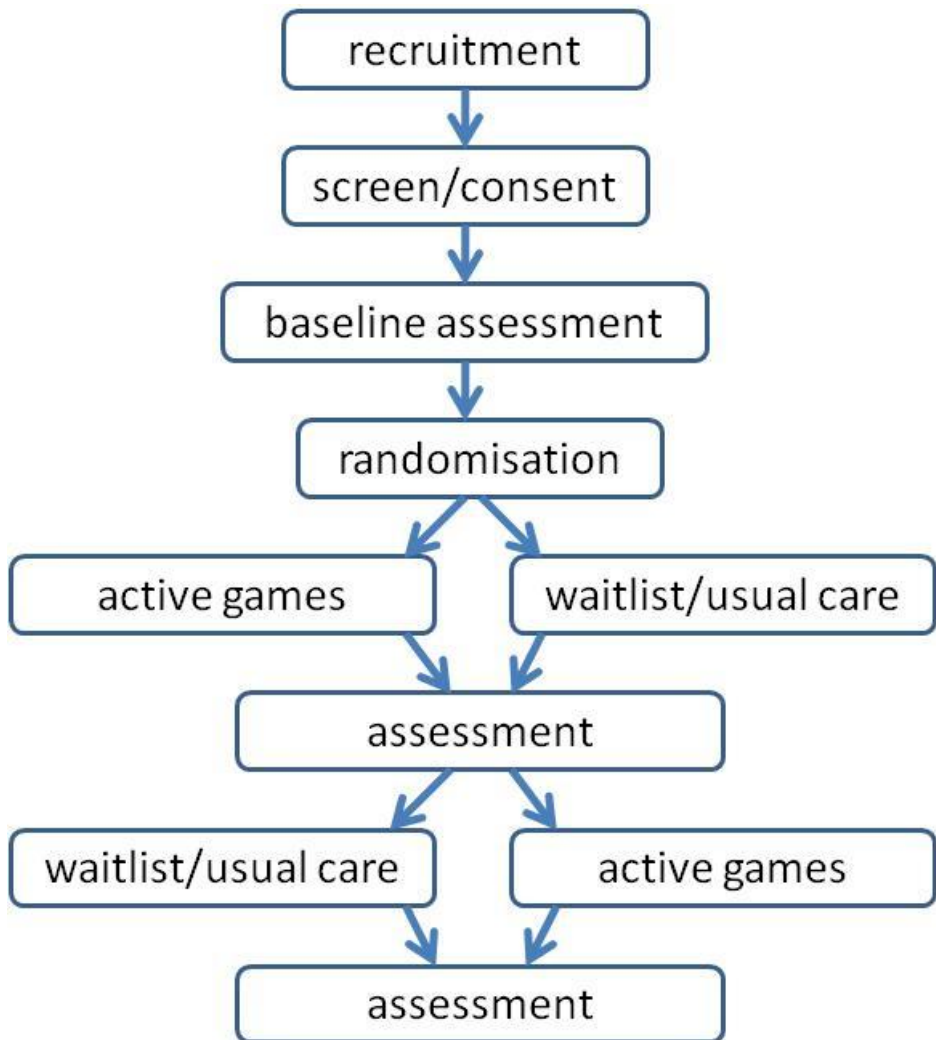

Supplement: MOESM4 [file 9489050]
